# 1 A genotype independent *DMP*-HI system in dicot crops

2 Yu Zhong<sup>1,6</sup>, Baojian Chen<sup>2,6</sup>, Dong Wang<sup>1,6</sup>, Xijian Zhu<sup>3,6</sup>, Yuwen Wang<sup>1,6</sup>, Mengran  
3 Li<sup>1</sup>, Yifan Li<sup>4</sup>, Jinchu Liu<sup>1</sup>, Jinzhe Zhang<sup>5</sup>, Ming Chen<sup>1</sup>, Min Wang<sup>1</sup>, Tjitske Riksen<sup>2</sup>,  
4 Xiaolong Qi<sup>1</sup>, Dehe Cheng<sup>1</sup>, Zongkai Liu<sup>1</sup>, Jinlong Li<sup>1</sup>, Chen Chen<sup>1</sup>, Yanyan Jiao<sup>1</sup>,  
5 Wenxin Liu<sup>1</sup>, Bin Yi<sup>4</sup>, Sanwen Huang<sup>3</sup>, Chenxu Liu<sup>1\*</sup>, Kim Boutilier<sup>2\*</sup> and Shaojiang  
6 Chen<sup>1\*</sup>

7 <sup>1</sup>National Maize Improvement Center of China, Key Laboratory of Crop Heterosis and  
8 Utilization/Engineering Research Center for Maize Breeding, Ministry of Education,  
9 College of Agronomy and Biotechnology, China Agricultural University, Beijing  
10 100193, China.

11 <sup>2</sup>Bioscience, Wageningen University and Research, Wageningen, Netherlands.

12 <sup>3</sup>Genome Analysis Laboratory of the Ministry of Agriculture, Agricultural Genomics  
13 Institute at Shenzhen, Chinese Academy of Agricultural Sciences, Shenzhen 518124,  
14 China.

15 <sup>4</sup>National Key Laboratory of Crop Genetic Improvement, Huazhong Agricultural  
16 University, Wuhan, Hubei, 430070.

17 <sup>5</sup>Institute of Vegetables and Flowers, Chinese Academy of Agricultural Sciences, Key  
18 Laboratory of Biology and Genetic Improvement of Horticultural Crops of the Ministry  
19 of Agriculture, Sino-Dutch Joint Laboratory of Horticultural Genomics, Beijing  
20 100081, China.

21 <sup>6</sup>These authors contributed equally to this work.

22 \*e-mail: liucx@cau.edu.cn; kim.boutilier@wur.nl; chen368@126.com.

23 **Running title:** Haploid seed induction in dicot crops

## 24 **ABSTRACT**

25 Doubled haploid (DH) technology is used to obtain homozygous lines in a single  
26 generation, which significantly accelerates the crop breeding trajectory. Traditionally,  
27 *in vitro* culture is used to generate DHs, but is limited by species and genotype  
28 recalcitrance. *In vivo* haploid induction (HI) through seed is been widely and efficiently  
29 used in maize and was recently extended to several monocot crops. However, a similar  
30 generic and efficient HI system is still lacking in dicot crops. Here we show that  
31 genotype-independent *in vivo* HI can be triggered by mutation of *DMP* genes in tomato,  
32 rapeseed and tobacco with HI rates of ~1.9%, 2.4% and 1.2%, respectively. The *DMP*-  
33 HI system offers a robust DH technology to facilitate variety improvement in these  
34 crops. The success of this approach and the conservation of *DMP* genes paves the way  
35 for a generic and efficient genotype-independent HI system in other dicot crops.

36 **Key words:** doubled haploid technology, maternal haploid induction, genotype  
37 independent, dicot crops.

## 38 INTRODUCTION

39 The rapid development of high yield and quality crop varieties is essential to ensure  
40 world-wide food and commodity security. One of the most important aspects of crop  
41 breeding is the development of homozygous lines. Homozygous lines can be developed  
42 by repeated rounds of selfing or backcrossing, usually four to six generations depending  
43 on the desired level of homozygosity, which is a costly and time-consuming process  
44 (Heusden and Lindhout, 2018). Alternatively, homozygous lines can also be obtained  
45 in a single generation by using DH technology (Jacquier et al., 2020). Haploid embryos  
46 can be induced *in vitro* from cells of the male or female gametophyte or *in vivo* in seeds  
47 by interspecific crosses or by intraspecific crosses with haploid inducer lines  
48 (Kalinowska et al., 2019; Lv et al., 2020; Wang et al., 2021). Of these methods, *in vivo*  
49 HI triggered by inducer lines is the most efficient approach, but it is currently limited  
50 to few monocot crops. Although HI systems have been reported for some dicot crops,  
51 unlike monocot crops, these systems are either inefficient or have not been extended to  
52 other dicot crops (Hougas and Peloquin, 1957; Hougas et al., 1958; Fu et al., 2018;  
53 Jacquier et al., 2020; Hooghvorst and Nogués, 2020a). Dicots account for the majority  
54 of the angiosperm species, including many economically important vegetable, fruit,  
55 seed and industrial crops like tomato (*Solanum lycopersicum*), chili pepper (*Capsicum*  
56 *annuum*), cucumber (*Cucumis sativus*), rapeseed (*Brassica napus*), soybean (*Glycine*  
57 *max*), cotton (*Gossypium hirsutum*) and tobacco (*Nicotiana tabacum*). However, many  
58 important dicot crops are completely recalcitrant for haploid induction, e.g., tomato and  
59 cotton, while almost all crops have recalcitrant genotypes (Jacquier et al., 2020;  
60 Hooghvorst and Nogués, 2020a; Hooghvorst and Nogués, 2020b). The lack of suitable  
61 HI systems for many dicot crops means that the slower and more costly classical  
62 breeding approach is still required in the development of homozygous lines.

63 Significant breakthroughs in DH production have been made in the last few years  
64 through the identification of genes that induce maternal haploid embryos *in vivo* in  
65 maize. Maternal HI systems rely on pollination by specific male inducer lines that  
66 stimulate the haploid egg cell to develop into an embryo that lacks the parental  
67 chromosome component (Hougas and Peloquin, 1957; Hougas et al., 1958; Hussain  
68 and Franks, 2019; Jacquier et al., 2020). Naturally occurring HI lines have been used  
69 extensively in maize breeding programs since the 1950s (Coe, 1959), and this trait was  
70 rapidly engineered in a number of monocot crops after identification of the  
71 *ZmPHOSPHOLIPASE-A1/MATRILINEAL/NOT LIKE DAD* (*ZmPLA1/MTL/NLD*) HI  
72 gene (Kelliher et al., 2017; Liu et al., 2017; Gilles et al., 2017; Yao et al., 2018; Zhong  
73 et al., 2019; Liu et al., 2019; Liu et al., 2020).

74 *ZmPLA1/MTL/NLD* genes have only been identified in monocots (Kelliher et al., 2017;  
75 Yao et al., 2018; Liu et al., 2019), while genes related to a second maize HI gene, *Zea*  
76 *may DOMAIN OF UNKNOWN FUNCTION 679 membrane protein (ZmDMP)*, have  
77 been identified in both monocots and dicots (Zhong et al., 2020). The utility of *dmp*  
78 mutants for HI in dicots was recently demonstrated in the model plant *Arabidopsis*  
79 (*Arabidopsis thaliana*) (Zhong et al., 2020), but it is not known whether this approach  
80 can be translated to dicot crops. Here, we developed a method to identify candidate  
81 *DMP* genes for HI in crops and demonstrate *DMP*-mediated maternal HI in three major  
82 dicot crops with different ploidy levels and from two different plant families, tomato,  
83 rapeseed and tobacco. This breakthrough, together with genotype independent HI in  
84 tomato, provides proof-of-concept for the development of a universal *DMP*-HI system  
85 in dicot crops.

## 86 **RESULTS**

### 87 ***DMP* genes in dicot crops**

88 Our previous results identified *ZmDMP* orthologues in multiple species, but with an  
89 average amino acid sequence identity of 66%. Moreover 42% of dicots contain multiple  
90 *DMP* gene copies as a result of genome duplication and/or interspecific hybridization  
91 (Zhong et al., 2020). The relatively low sequence identity and the presence of multiple  
92 gene copies makes it difficult to accurately identify *ZmDMP* orthologues for the  
93 development of a *DMP*-HI system in dicot crops. To this end, *DMP* proteins from seven  
94 dicot crops with the highest amino acid sequence identity with *ZmDMP* were each used  
95 as a query to search the corresponding genome database of each crop. *DMP* genes  
96 with >50% amino acid identity were selected for expression analysis using public  
97 transcriptome databases. We identified: up to four *DMP* genes in rapeseed (*B. napus*)  
98 (*BnDMP1A/BnaA03g55920D*; *BnDMP1C/BnaC03g03890D*;  
99 *BnDMP2A/BnaA04g09480D*; *BnDMP2C/BnaC04g31700D*) that are all highly  
100 expressed in anthers and flower buds; a single *DMP* gene in tomato (*Solanum*  
101 *lycopersicon*) (*SlDMP/Solyc05g007920*) that is highly expressed in pollen and flower  
102 buds (Zhong et al., 2020); a single *DMP* gene in chili pepper (*Capsicum annuum*)  
103 (*CaDMP/Capana04g002148*) that is highly expressed in closed flower bud and open  
104 flower; two cotton (*Gossypium hirsutum*) *DMP* genes (*GhDMP1/LOC107911807*;  
105 *GhDMP2/LOC107924398*) that are expressed in the stamen; two soybean (*Glycine max*)  
106 *DMP* genes (*GmDMP1/GLYMA\_18G097400*; *GmDMP2/GLYMA\_18G098300*)  
107 expressed in flower bud; and a single cucumber (*Cucumis sativus*) *DMP* gene  
108 (*CsDMP/Csa\_1G267250*) that is expressed in male flower bud (Supplemental Table 1).  
109 Expression data was not available for tobacco (*Nicotiana tabacum*), which contained  
110 three *DMP* genes (*NtDMP1/LOC107762412*; *NtDMP2/LOC107783066*;

111 *NtDMP3/LOC107807404*). Like DMP proteins in maize and arabidopsis (Takahashi et  
112 al., 2018; Cyprys et al., 2019; Zhong et al., 2019; Zhong et al., 2020), all of the above  
113 DMP proteins have a DUF679 domain and multiple transmembrane (TM) helices  
114 (Supplemental Table 1). Alignment of these DMP proteins showed that the entire  
115 DUF679 domain (>56% identity) and especially the first predicted transmembrane  
116 helices (>80% identity) are conserved among these species (Supplemental Figure 1 and  
117 Supplemental Table 2).

118 Next, a complementation strategy was used to determine whether these candidate *DMP*  
119 genes have potential HI functions, as measured by their ability to rescue the reduced  
120 seed set phenotype of the arabidopsis *dmp8dmp9* HI mutant. To this end, eight of the  
121 above *DMP* genes were expressed with the *AtDMP9* promoter in the *dmp8dmp9*  
122 background, and seed setting evaluated in T<sub>1</sub> plants. All of the eight genes significantly  
123 increased the seed set of the arabidopsis *dmp8dmp9* mutant (Figure 1), indicating that  
124 these *DMP* genes can complement *AtDMP8* and *AtDMP9* functions during double  
125 fertilization (Takahashi et al., 2018; Cyprys et al., 2019; Zhong et al., 2020), and could  
126 be used to develop a HI system in these dicots. Tomato, rapeseed and tobacco have  
127 well-established genetic transformation systems and are relatively easy to hybridize,  
128 which led us to explore the possibility of developing *DMP*-HI systems in these three  
129 crops.

### 130 **Haploid seed induction, identification, and DH production in tomato**

131 A CRISPR-Cas9 mutagenesis construct was designed to generate *dmp* loss-of-function  
132 mutants in the three tomato cultivars (Figure 2A). The construct also includes the  
133 FAST-Red marker for haploid identification (Zhong et al., 2020). Mutants with  
134 insertions and/or deletions that resulted in translational frame shifts and premature stop  
135 codons were found in the T<sub>0</sub> generation of the Ailsa Craig, Micro-Tom and Moneyberg  
136 genotypes (Supplemental Table 3). Homozygous or biallelic *sldmp* mutants were  
137 chosen for subsequent experiments (Figure 2B). Pleiotropic seed phenotypes were  
138 observed in self-pollinated fruits from these *sldmp* mutants (Figure 2C-2E and  
139 Supplemental Figure 2 and Supplemental Figure 3A-3C and Supplemental Figure 4A-  
140 4C). Compared to wild type plants, the number of filled seeds was significantly reduced  
141 (Figure 2D and Supplemental Figure 3B and Supplemental Figure 4B). and the  
142 percentage of both aborted seeds and undeveloped ovules significantly increased  
143 (Figure 2E and Supplemental Figure 3C and Supplemental Figure 4C) in *sldmp* mutants.  
144 Reciprocal crosses between wild type and the Ailsa Craig *dmp* mutant and analysis of  
145 pollen germination showed that the abnormal seed phenotypes are due to a paternal  
146 (pollen) fertilization defect (Supplemental Figure 5), as previously shown for  
147 arabidopsis (Takahashi et al., 2018; Cyprys et al., 2019).

148 To determine whether *sldmp* mutants can induce haploids upon selfing, we sowed  
149 selfed seeds from T<sub>1</sub> progenies of *sldmp* mutants in the Ailsa Craig background. In the  
150 absence of segregating molecular markers, we first identified putative haploid plants  
151 based on their phenotype, i.e. smaller organs and sterility (Ravi and Chan, 2010; Zhong  
152 et al., 2019; Zhong et al., 2020). Among 55 T<sub>1</sub> plants, one plant (1.8%), which was  
153 relatively shorter and bushier than the wild-type control (Figure 2F), showed the typical  
154 haploid phenotype (Figure 2G-2J). This plant was subsequently confirmed by ploidy  
155 analysis to be a true haploid (Figure 2K). Given the low frequency of spontaneous  
156 haploid seedling production in tomato (from  $9 \times 10^{-5}$  to  $4 \times 10^{-4}$ ) (Cook, 1936;  
157 Koornneef et al., 1989; Hamza et al., 1993), our data suggests that mutation of the  
158 tomato pollen-expressed *DMP* gene facilitates *in vivo* haploid embryo development.

159 Next, we crossed a range of wild-type female plants (Supplemental Table 4) from  
160 different genetic backgrounds with *sldmp* mutants in the Ailsa Craig, Micro-Tom and  
161 Moneyberg backgrounds to determine whether *sldmp* pollen can also induce maternal  
162 haploids upon outcrossing. All crosses showed the reduced seed set and abnormal  
163 ovule/seed phenotypes observed in the wild-type  $\times$  *sldmp* crosses (Figure 3A-3C and  
164 Supplemental Figure 2 and Supplemental Figure 3D-3F and Supplemental Figure 4D-  
165 4F). Nineteen haploids derived from eight different backgrounds were first screened by  
166 molecular markers and then confirmed by flow cytometry and plant phenotype  
167 (Supplemental Figure 3G-3I and Supplemental Figure 4G-4I and Supplemental Table  
168 5). To further confirm the maternal origin of these haploids, three of these haploid  
169 seedlings were used for whole-genome resequencing. Chromosome dosage and single  
170 nucleotide polymorphism (SNP) analysis showed that none of the seedlings was  
171 aneuploid or carried paternally-derived SNPs, suggesting that *sldmp* induces ‘clean’  
172 maternal haploids i.e. haploids lacking any paternal genome fragments (Supplemental  
173 Figure 6 and Supplemental Table 6). These results confirmed that *sldmp* mutants in one  
174 genotype can be used for clean maternal haploid induction in the same or a different  
175 genotype.

176 The arabidopsis Fast-Red marker has been used as a simple and efficient method to  
177 facilitate high throughput identification of haploids from *dmp* crosses (Zhong et al.,  
178 2020). To this end, Fast-Red marker expression was evaluated in wild-type seeds and  
179 seeds from two selfed *sldmp* mutant lines carrying the homozygous Fast-Red marker.  
180 Red/RFP-positive seeds were observed among the imbibed *sldmp* seeds under white  
181 light/fluorescent light, but only white/RFP-negative seeds were observed among the  
182 imbibed wild-type seeds (Supplemental Figure 7A). Next we separated the *sldmp* and  
183 wild-type seeds into the embryo, endosperm and seed coat components. *sldmp* embryos  
184 and endosperm were red/RFP-positive under white/fluorescent light, with the



185 endosperm showing a weaker red color/RFP expression than the embryo, while none  
186 of the wild-type seed components were red/showed RFP expression (Supplemental  
187 Figure 7B). In line with our observations in imbibed seeds, red color/RFP were also  
188 observed under white light/fluorescent light in root tips of *sldmp* embryos during  
189 germination, but not in the root tips of the germinating wild-type embryos  
190 (Supplemental Figure 7C). These data show that the FAST-Red reporter is reliably  
191 expressed in the embryo and endosperm of tomato seeds.

192 To determine whether the Fast-Red marker can be used to identify tomato haploids in  
193 *dmp* crosses, we analyzed Fast-Red expression in seeds from a cross between a female  
194 wild-type DF199 line and a male *dmp* Ailsa Craig line. Imbibed seeds were first  
195 classified into red and white seed groups based on their color under white light (Figure  
196 3, D and E). Under fluorescent light, the red seeds showed weak RFP expression in the  
197 endosperm and strong RFP expression in the embryo, while the majority of the white  
198 seeds also showed weak RFP expression in the endosperm but lacked RFP expression  
199 in the embryo (Figure 3D and 3E and Supplemental Figure 8). Some of the seeds that  
200 were initially scored as white under white light showed RFP expression in the embryo  
201 and endosperm under florescent light and were recategorized as red/RFP-expressing  
202 seeds. These two groups were further confirmed by checking root tip RFP expression  
203 during germination (Figure 3D and 3F). The red seeds with RFP expression in the  
204 embryo and endosperm were considered to carry diploid embryos, while the white seeds  
205 with weak RFP in the endosperm and no RFP expression in the embryo were considered  
206 to have maternal haploid embryos that developed spontaneously in the absence of  
207 fertilization or without the paternal chromosome component. To test this hypothesis,  
208 we sowed 218 putative haploid seeds that only showed weak RFP expression in the  
209 endosperm and 2303 putative diploid seeds that showed strong RFP expression in both  
210 the embryo and endosperm and confirmed their ploidy by molecular marker and ploidy  
211 analysis at the seedling stage (Figure 3G and 3H). We showed that all of the putative  
212 haploids were true haploids, and that all of the putative diploids were true diploids i.e.,  
213 that there were no false positives or false negatives in the two seed groups  
214 (Supplemental Table 7). The FAST-Red selection procedure outlined above can  
215 therefore be used with 100% accuracy for identification of maternal haploids in tomato.

216 Next, we used the Fast-Red marker for haploid seed selection in crosses between  
217 diverse female tomato genotypes (Supplemental Table 4) and male *sldmp* FAST-Red  
218 lines. FAST-Red expression was stable among multiple female backgrounds after  
219 outcrossing with *sldmp* FAST-Red lines in the Ailsa Craig background (Supplemental  
220 Figure 9). The haploid induction rate (HIR) after crossing 36 different female genotypes  
221 with the *sldmp* inducer lines ranged from 0.5% to 3.7%, with an average HIR of 1.9%

222 (Table 1). These data together with haploid induction in an additional six crosses  
223 (Supplemental Table 5) indicate that *sldmp* mutants in a given genotype can be used for  
224 efficient maternal haploid induction in the same or different genotype.

225 Haploid plants are sterile and must undergo chromosome doubling to develop into  
226 fertile plants. Chromosome doubling is usually induced chemically, but spontaneous  
227 doubling of haploid embryos *in vitro* is also commonly observed (Segu&iacute;-  
228 Simarro and Nuez, 2008). Surprisingly, spontaneous diploidization was also observed  
229 *in vivo* in *dmp*-induced tomato haploid plants, as evidenced by the production of viable  
230 pollen and seed-bearing fruits (Supplemental Figure 10). All nine haploid plants  
231 produced viable pollen, of which seven (78%) produced fruits and three (33%)  
232 eventually produced viable seeds (Supplemental Table 8). Tomato haploid plants can  
233 be easily propagated using cuttings from the parent plant (Supplemental Figure 11) and  
234 might be used to generate a higher proportion of spontaneous DH plants. After treating  
235 cuttings with the chemical doubling agent colchicine, three out of seven haploid plants  
236 successfully converted into DH plants with diploid cells and a high percentage (62%)  
237 of viable pollen (Supplemental Figure 12). Overall, we established a tomato DH  
238 breeding method including *DMP*-HI, FAST-Red based haploid identification and  
239 chromosome doubling.

#### 240 ***DMP*-HI systems for dicot polyploid crops**

241 To determine whether the *DMP*-HI system could be used in polyploid dicots crops, we  
242 evaluated the system in rapeseed (cv. Westar) and tobacco (cv. K326), both of which  
243 are amphidiploids. We found that one of the possible four *BnDMP* genes, *BnDMP1C*,  
244 was lost from the Westar genome, which was confirmed by a BLAST search (Song et  
245 al., 2020). Knock-out mutants of the three *DMP* genes in rapeseed (Figure 4A and 4B  
246 and Supplemental Table 3) and tobacco were obtained using CRISPR-Cas9 mediated  
247 mutagenesis (Figure 5A and 5B and Supplemental Table 3). We first determined the  
248 seed setting rate in *B. napus* selfing and crossing progenies. Compared with wild type,  
249 the number of filled seeds and the percentage seed set was significantly reduced in  
250 *bndmp* triple mutants (Figure 4C and 4D). Seed setting rate was not evaluated in  
251 tobacco.

252 Next, we further verified the HI ability of the *bndmp* and *ntdmp* mutants. First, selfed  
253 progenies of *bndmp* and *ntdmp* mutants were screened for putative haploids based on  
254 their phenotypes. One of 97 T<sub>1</sub> *bndmp* triple mutant plants (1.0%) and nine plants of  
255 1,111 T<sub>1</sub> *ntdmp* triple mutant plants (0.8%) showed the typical haploid phenotype  
256 (Table 2 and Table 3 and Supplemental Figure 13 and Supplemental Figure 14). These  
257 putative haploid plants were subsequently confirmed to be true haploids by ploidy

258 analysis, suggesting that *bndmp* and *ntdmp* loss-of-function mutant can induce  
259 haploids in selfed progenies.

260 Then, crosses between the cytoplasmic male sterile lines Hau-A and *pol* CMS with  
261 *bndmp* mutants and between cultivars K326 and Yan97 with *ntdmp* mutants were made  
262 to determine whether *dmp* mutations can induce maternal haploids when used as the  
263 male parent. Unlike tomato, both rapeseed and tobacco only showed weak FAST-Red  
264 expression in imbibed seeds (Figure 4E), which made it difficult to identify haploid  
265 embryos at this stage. Therefore, all crossed progenies were germinated in water and  
266 the embryos assayed for RFP expression. The FAST-Red marker was not expressed in  
267 germinating embryos from the *ntdmp* mutant crosses (data not shown), but was  
268 expressed in cotyledons of germinated embryos from the *bndmp* mutant crosses (Figure  
269 4F). Therefore, rapeseed putative haploids were first screened with Fast-Red marker  
270 and then further evaluated by molecular marker analysis (Figure 4G), while tobacco  
271 putative haploids were screened with molecular markers (Figure 5C). Putative haploid  
272 plants were subsequently confirmed by ploidy analysis and plant phenotype (Figure 4,  
273 H and I and Figure 5D-5F and Supplemental Figure 13 and Supplemental Figure 14).  
274 Overall, we found that crossing with *dmp* mutants induces a HIR of 1.1% to 3.9% in *B.*  
275 *napus* (Table 2) and a HIR of 0.8% to 1.6% in tobacco (Table 3).

## 276 **DISCUSSION**

277 Our study demonstrates for the first time that *dmp* mutants induce *in vivo* maternal  
278 haploids in multiple dicot crops. More importantly, we also show that *dmp* mutation  
279 can be used for haploid induction in a wide range of genotypes: *dmp* mutations in three  
280 tomato genotypes were used to obtain haploids in 39 different female genotypes that  
281 differ in their genetic backgrounds, including both determinate and indeterminate  
282 growth types, as well as fruit types that differ in color, shape and size (Supplemental  
283 Table 4). Our data therefore suggest that a single *dmp* mutant line can be used to  
284 develop a genotype-independent DH technology in dicot crops.

285 Identification of the correct *ZmDMP* (co)ortholog for HI can be challenging due to low  
286 sequence identity and/or the presence of multigene families. In this study, we show that  
287 candidate *DMP* genes can be initially selected based on their sequence identity and by  
288 their pollen/flower expression pattern, and then verified in a complementation strategy  
289 in arabidopsis. Although we did not assess *DMP*-HI in chili pepper, cotton, soybean  
290 and cucumber, our success in developing a *DMP*-HI system in tomato, rapeseed and  
291 tobacco suggests that this bioinformatics approach can be used to identify candidate  
292 *DMP* genes for the development of HI systems in other dicots.



293 Given the presence of conserved *DMP* genes in dicot species (Zhong et al., 2020), and  
294 our success in inducing haploids in tomato, rapeseed and tobacco, it is likely that *DMP*  
295 mutation can be applied easily to generate *in vivo* haploid inducers in other dicot crops.  
296 Most commercial varieties of self-compatible vegetable crops are F<sub>1</sub> hybrids. For many  
297 crops, up to 100% of a professional company's seed portfolio can comprise F<sub>1</sub> hybrids.  
298 F<sub>1</sub> hybrid production requires the development of near homozygous parent lines, which can be greatly accelerated  
299 using DH technology, but often no widely-applicable *in vitro* or *in vivo* DH protocols are  
300 available, as is the case for tomato (Jacquier et al., 2020; Hooghorst and Nogués,  
301 2020a). In addition to self-compatible crops, the *DMP*-HI system might useful to induce  
302 maternal haploids via outcrossing for self-incompatible species like tetraploid potato  
303 (Ye et al., 2018), for which it is difficult to produce inbred lines for breeding. Moreover,  
304 *DMP* genes can also be found in fruit and forest trees species, like apple (*Malus*  
305 *domestica*), sweet cherry (*Prunus avium*) and rubber tree (*Hevea brasiliensis*), which  
306 take many years to reach the reproductive stage and for which homozygous line  
307 production is a lengthy process. *DMP*-HI systems can also be developed in non-  
308 transformable crops by using chemical/radiation mutagenesis to generate *dmp* mutants.  
309 Development of a genotype-independent *DMP*-HI system to other dicot crops would  
310 therefore represent a major advance over *in vitro* haploid production, where individual  
311 protocols must be developed for every species and genotype. This is especially true for  
312 members of the Solanaceae, Fabaceae, and Cucurbitaceae where recalcitrance for DH  
313 production is a major bottleneck for efficient breeding (Hooghorst and Nogués, 2020a).

314 The FAST-Red marker facilitated efficient identification of maternal haploids in tomato.  
315 However, other than in arabidopsis (Zhong et al., 2020) and tomato, FAST-Red was  
316 not observed in rapeseed seeds, which might be due to the thick and darker seed coat  
317 of rapeseed, but could be observed in germinating embryos. Given that the same marker  
318 was only weakly expressed in tobacco seeds, either a more highly expressed late seed  
319 promoter or other visible markers, e.g., RUBY system (He et al., 2020), could be  
320 evaluated in future study to set robust haploid identification system. Alternatively,  
321 haploids can be selected based on the absence of paternal morphological or molecular  
322 markers.

323 We observed that the HIR in tomato is influenced by the female genotype (Table 1), as  
324 reported previously in maize (Prigge et al., 2011; Wu et al., 2014). This implies that  
325 beside novel paternal enhancers, novel maternal enhancers can also be identified and  
326 used in combination with *DMP* mutation to develop even more robust *in vivo* HI  
327 protocols. Given the universality of the *DMP*-HI system, enhancer screens for improved  
328 HIR could be carried out in any one crop, and newly identified enhancer genes  
329 implemented in other crops.

## 330 **METHODS**

### 331 **Identify *DMP* genes in dicot crops**

332 The full-length amino acid sequence of ZmDMP was first used for a BLASTP search  
333 (<https://blast.ncbi.nlm.nih.gov/Blast.cgi>) to identify the *DMP* gene with the highest  
334 identity for each crop. Then, these *DMP* genes were used as query to search the  
335 corresponding genome database of each crop and the *DMP* genes with >50% amino  
336 acid identity were selected for further analysis. Domain and transmembrane helices  
337 prediction was performed using the Pfam database (<http://pfam.xfam.org>) and  
338 TMHMM - 2.0 (<https://services.healthtech.dtu.dk/service.php?TMHMM-2.0>),  
339 respectively. Expression patterns of *DMP* genes were obtained from published data  
340 (Qin et al., 2014; Zhong et al., 2020) and public databases  
341 (<https://biodb.swu.edu.cn/brassica/home> and <http://cucurbitgenomics.org/>). The full-  
342 length amino acid sequences of *DMP* genes were aligned with MUSCLE embedded in  
343 SnapGene software (from Insightful Science; available at [snapgene.com](http://snapgene.com)). Detailed  
344 information on the *DMP* genes is provided in Supplemental Table 1.

### 345 **Vector construction**

346 Primers used to amplify and sequence the *DMP* alleles were designed based on the  
347 *DMP* gene sequences downloaded from Gramene or NCBI. For rapeseed and tomato,  
348 all gRNAs were driven by the *U6-26* promoter. *NPTII* driven by the *nopaline synthase*  
349 (*Nos*) promoter from *Agrobacterium tumefaciens* and *35S:GFP* were used for transgene  
350 selection during transformation, and, FAST-Red was used for identification of haploid  
351 seeds. These cassettes, together with human codon-optimized Cas9 driven by *35S*  
352 promoter, were introduced simultaneously in one step into pISCL4723 through the  
353 Golden Gate cloning method (Wang et al., 2019). To generate the CRISPR/Cas9  
354 mutagenesis construct for tobacco *DMP* genes, the FAST-Red cassette was first  
355 amplified with FAST-Red-F/R primers and ligated into KpnI-linearized  
356 pDIRECT\_22C to yield pDIRECT\_22C\_FastR using the Seamless Assembly Cloning  
357 Kit (C5891–25, Clone Smarter). Four gRNAs separated by 20-bp Csy4-binding sites  
358 were introduced simultaneously in one step into pDIRECT\_22C\_FastR with a  
359 previously reported protocol (Čermák et al., 2017). For *DMP* gene complementation  
360 constructs, CDS sequences of each *DMP* gene from different crops were cloned and  
361 driven by the *AtDMP9* promoter (1836 bp upstream of the ATG start codon). FAST-  
362 Red and *35S:RUBY* (He et al., 2020) were used for transgenic seed selection. These  
363 cassettes were introduced simultaneously in one step into pISCL4723 through the  
364 Golden Gate cloning. The primers used for vector construction are listed in  
365 Supplemental Table 9.

## 366 **Plant materials**

367 The spring-type rapeseed cultivar Westar, a tobacco cultivar K326 and three tomato  
368 cultivars (Ailsa Craig, Micro-Tom and Moneyberg) were used as receptor lines to  
369 knock out *DMP* genes. Two male sterile lines of rapeseed (Hau-A and *pol* CMS), two  
370 cultivars of tobacco (K326 and Yan97) and dozens of tomato varieties (described in  
371 Supplemental Table 4) were used as the female parents to evaluate the outcrossing HIR  
372 of *dmp* mutants. Rapeseed, tobacco and tomato transgenic plants were obtained by  
373 *Agrobacterium*-mediated transformation as previously described (Horsch et al., 1985;  
374 van Roekel et al., 1993; Dai et al., 2020). All plants were grown in the greenhouse under  
375 natural light. The arabidopsis *dmp8dmp9* mutant (Zhong et al., 2020) was used to  
376 generated different complementation lines by *Agrobacterium tumefaciens*-mediated  
377 floral dip transformation (Clough and Bent, 1998).

## 378 **Screening for *dmp* mutants**

379 Sanger sequencing was performed to identify *dmp* mutants in T<sub>0</sub> transgenic lines. All  
380 sequences were aligned to the *DMP* wild-type allele with SnapGene software. PCR  
381 products containing multiple amplification products from the same locus were further  
382 amplified with KOD FX (Toyobo) and cloned into the *pEASY* vector (pEASY-Blunt  
383 Zero Cloning Kit, TransGen Biotech). At least six independent colonies were selected  
384 and sequenced by the Tsingke Biological Technology Co., Ltd. The primers used for  
385 *dmp* mutants genotyping are list in Supplemental Table 9.

## 386 **Pollen viability evaluation**

387 Mature tomato flowers were used for the pollen analyses. A needle was used to slice  
388 open the anther lengthwise and then dragged upwards through the locule of the anther  
389 to collect pollen on the tip of the needle. For the pollen germination experiment, pollen  
390 grains were incubated in liquid medium (10% sucrose, 0.01% boric acid, 0.1% yeast  
391 extract, 5 mM CaCl<sub>2</sub>, 50 μM KH<sub>2</sub>PO<sub>4</sub> and 15% PEG 4000) in the dark at 30 °C for 1  
392 hour. Images were captured using a light microscope (CX41, Olympus, Japan) fitted  
393 with a Nikon DS-Ri1 camera. Viability was scored using the pollen germination rate.  
394 A pollen grain was scored as germinated when it formed a pollen tube. For the pollen  
395 staining experiment, pollen grains were stained on a microscope slide using  
396 Alexander's stain solution (Solarbio) and photographed using a light microscope (Axio  
397 Imager Z2, Zeiss, Germany) fitted with a Canon EOS 6D camera. Red-stained pollen  
398 was scored as viable.

## 399 **Analysis of seed phenotypes**

400 Tomato and rapeseed seeds were harvested from ripe fruits and used to score  
401 phenotypes. Seeds were divided into three categories (normal seeds, aborted seeds and

402 undeveloped ovules) based on their size and color. For tomato seed dissection, a razor  
403 blade was used to cut the imbibed seeds lengthwise into two uneven pieces (1/4 and  
404 3/4). The larger piece containing the embryo was used to separate the embryo and testa  
405 from the endosperm with fine forceps under a stereo microscope (S6D, Leica,  
406 Germany). Samples were observed and photographed using a stereo fluorescence  
407 microscope (SEX16, Olympus, Japan) fitted with Olympus DP72 camera. For  
408 arabidopsis, siliques were cleared with a previously described method (Zhong et al.,  
409 2020) and photographed using a Leica S6D stereo microscope.

#### 410 **Haploid identification**

411 Haploids from selfed *dmp* mutant lines were first identified based on their phenotype  
412 and then confirmed by flow cytometry.

413 In the T<sub>1</sub> generation, *sldmp* mutant lines with or without the segregating Fast-Red  
414 marker were used as pollen donors in a cross with wild-type female parents. All the  
415 seeds derived from these crosses were sown in soil and grown to the seedling stage.  
416 One molecular marker with a polymorphism between the *sldmp* mutant lines and testers  
417 was used to screen for putative haploid seedlings. Then, the ploidy of these putative  
418 haploid seedlings was then confirmed by flow cytometry.

419 In the T<sub>2</sub> generation, *sldmp* mutants with a homozygous Fast Red marker were used in  
420 crosses. Seeds derived from these crosses were first treated with 2% sodium  
421 hypochlorite for 15 minutes (to improve Fast-Red detection) and then divided into two  
422 groups (red seeds and white seeds) based on their color under white light. The red seeds  
423 with RFP expression in the embryo and endosperm were considered to carry diploid  
424 embryos. All the white seeds were treated a second time with 2% sodium hypochlorite  
425 for 15 minutes and sown on half-strength Murashige and Skoog medium. White seeds  
426 were further divided into two classes (strong RFP seeds and weak RFP seeds) under  
427 fluorescent light (excitation wavelength 540 nm, emission wavelength 600) using a  
428 hand-held lamp (LUYOR-3415RG). During germination, both seed classes were also  
429 checked for the absence/presence of RFP in the root tip. Seeds with weak RFP  
430 expression that did not show RFP signal in embryo root tip were scored as putative  
431 haploids. These putative haploids were further confirmed at the seedling stage by  
432 molecular markers and ploidy analysis.

433 In the wild-type  $\times$  *bndmp* progeny, haploids were first screened with the Fast-Red  
434 marker in the cotyledon of germinated seeds under fluorescent light (excitation  
435 wavelength 540 nm, emission wavelength 600) using a hand-held lamp (LUYOR-  
436 3415RG) and molecular markers (A07-1), and then confirmed by flow cytometry.

437 In the wild-type  $\times$  *ntdmp* progeny, both imbibed seeds and root tips of germinated seeds  
438 showed weak RFP expression, which made it difficult to identify haploids via Fast-Red

439 marker. Therefore, all tobacco haploids were first screened by a molecular marker  
440 (*NtDMP2*) and then confirmed by flow cytometry. The primers used for identification  
441 of haploids are shown in Supplemental Table 9.

#### 442 **Flow cytometry**

443 Fresh leaves (0.5 g) from each sample were chopped with a razor blade in 2 mL lysis  
444 buffer as previously described (Zhong et al., 2020), and filtered through an 80  $\mu$ m nylon  
445 filter. Nuclei were collected by centrifugation at 1000 r.p.m. for 5 minutes at 4  $^{\circ}$ C and  
446 stained with propidium iodide in the dark for 20 min. The ploidy level of each sample  
447 was analyzed with a BD FACSCalibur Flow Cytometer and BD CellQuest Pro software.  
448 Wild-type plants were used as a control and the position of its first signal peak was set  
449 at  $\sim$ 100 (FL2-A value). The samples with the first signal peak at  $\sim$ 50 (FL2-A value)  
450 were deemed to be haploids.

#### 451 **Whole-genome resequencing and genotype calling of tomato haploids**

452 Genomic DNA libraries of each sample were constructed and sequenced at an average  
453 depth of approximately 20-fold coverage using the Illumina high-throughput  
454 sequencing platform (Annoroad Gene Technology Co., Ltd, Beijing, China). Reads  
455 containing adapter sequence, reads with a high ratio of N (N bases accounting for more  
456 than 5% of the total reads) and reads with low quality (bases with a mass value less  
457 than 19 accounting for more than 50% of the total reads) were filtered from the raw  
458 data using fastp software (Chen et al., 2018). Clean reads of each sample were aligned  
459 to the tomato reference genome (SL4.0) using Bowtie2 software (Langmead and  
460 Salzberg, 2012). Uniquely mapped reads were used for SNP calling. Joint-genotype  
461 calling was carried out on the whole genome using HaplotypeCaller, CombineGVCFs  
462 and GenotypeGVCFs tools from GATK4 (ref.(Poplin et al., 2017)) (version 4.1.2.0).  
463 The SNPs with bi-alleles were selected and filtered with following parameters: QUAL  
464  $<$  1000.0, QD  $<$  2.0, MQ  $<$  40.0, FS  $>$  60.0, SOR  $>$  3.0, MQRankSum  $<$  -12.5,  
465 ReadPosRankSum  $<$  -8.0. These high quality SNPs were used for recombination map  
466 construction via a sliding window approach. The window size was set to 30 SNPs and  
467 the step size was set to 1 SNP.

#### 468 **Chromosome dosage analysis of tomato haploids**

469 The chromosome dosage analysis was performed as previously described (Tan et al.,  
470 2015). BAM files generated by Bowtie2 software were used to calculate the coverage  
471 of each bin from each sample with bamCoverage (parameters: --normalizeUsing CPM  
472 --binSize 100000) in deepTools (Ramírez et al., 2016) software. Relative coverage was  
473 calculated by dividing the coverage of each bin by the mean percentage of  
474 corresponding female parents.



## 475 **Propagation of tomato haploid plants from cuttings**

476 Strong side shoots from haploid plants were cut from the parent plant with sharp  
477 scissors and placed in water containing 0.2% (w/v) rooting hormone powder (Shandong  
478 Huanuo Federal Agrochemical Co.,Ltd) for about two weeks under LED light (150  
479  $\mu\text{mol m}^{-2} \text{s}^{-1}$ ) on a 16 h light/8 h dark photoperiod. Cuttings with well-developed roots  
480 were transplanted into 6 L pots with soil and grown in the greenhouse under the natural  
481 light.

## 482 **Colchicine treatment of tomato haploids**

483 For colchicine treatment, a solution was used that contained 0.06% colchicine  
484 (Cat#C3915, Sigma) dissolved in dimethyl sulfoxide, 2% DMSO, 5% glycerol and 1%  
485 Tween. For the control treatment, the same solution without colchicine was used.  
486 Haploid cuttings were planted and grown in the greenhouse under natural light for one  
487 month. The primary shoot apical meristem (SAM) was dipped in the colchicine solution  
488 for 1.5 min. The internode that was closest to the SAM was then marked as the starting  
489 point. After three to four new internodes developed from the treated meristem,  
490 expanded leaf samples were taken from the top internode for ploidy analysis.

## 491 **Data availability**

492 The datasets generated and/or analysed during the current study are available from the  
493 corresponding author on request.

## 494 **FUNDING**

495 This work was supported by National Key Research and Development Program of  
496 China (2016YFD0101200, 2018YFD0100201), China Agriculture Research System of  
497 MOF and MARA, National Natural Science Foundation of China (91935303,  
498 32001554, 31991185), the 2020 Research Program of Sanya Yazhou Bay Science and  
499 Technology City (SKJC-2020-02-003), China Postdoctoral Science Foundation  
500 (2020TQ0356) and a China Scholarship Council PhD fellowship (201506350003).

## 501 **AUTHOR CONTRIBUTIONS**

502 Y.Z., B.C., C.L., K.B. and S.C. conceived and designed the experiments. Y.Z., D.W.,  
503 B.C., X.Z. and Y.W. performed most of the experiments. M.L., Y.L., J.Liu, J.Z., M.C.,  
504 M.W., T.R., X.Q., D.C., Z.L., J.Li, C.C. and Y.J. performed some of the experiments.  
505 Y.Z., B.C., S.C., C.L., M.W. and W.L. analyzed the data. Y.Z., B.C., B.Y., S.H., K.B.  
506 and S.C. discussed and prepared the manuscript. All authors discussed the results and  
507 provided feedback on the manuscript.

## 508 **ACKNOWLEDGMENTS**

509 We thank Prof. Wencai Yang and Huolin Shen for providing the tomato seeds, Prof. Pu Wang,  
510 Yongsheng Qiu, Qinnan Wang and Hailong Chang for providing the greenhouse, Dr. Yubing He for  
511 sharing the *RUBY* construct, Prof. Xiaohong Yang for help with the analysis of haploid sequence data,  
512 Zhongqiu Li for help with the amino acid alignment, and Yixiao Liu for drawing the pictures of tomato  
513 seeds and seedlings. We thank Charlotte Siemons, Mieke Weemen and Xiaobing Jiang for help with  
514 pollination experiments and Vera Veltkamp for sharing tomato FAST-Red information.

## 515 REFERENCES

- 516 Čermák, T., Curtin, S. J., Gil-Humanes, J., Čegan, R., Kono, T. J. Y., Konečná, E., Belanto, J. J.,  
517 Starker, C. G., Mathre, J. W., Greenstein, R. L., et al. (2017). A multipurpose toolkit to  
518 enable advanced genome engineering in plants. *Plant Cell* **29**:1196–1217.
- 519 Chen, S., Zhou, Y., Chen, Y., and Gu, J. (2018). fastp: an ultra-fast all-in-one FASTQ preprocessor.  
520 *Bioinformatics* **34**:i884–i890.
- 521 Clough, S. J., and Bent, A. F. (1998). Floral dip: a simplified method for *Agrobacterium*-mediated  
522 transformation of *Arabidopsis thaliana*. *Plant J.* **16**:735–743.
- 523 Coe, E. H. (1959). A line of maize with high haploid frequency. *Am. Nat.* **93**:381–382.
- 524 Cook, R. R. (1936). A haploid marglobe tomato. *J. Hered.* **27**:433–435.
- 525 Cyprys, P., Lindemeier, M., and Sprunck, S. (2019). Gamete fusion is facilitated by two sperm cell-  
526 expressed DUF679 membrane proteins. *Nat. Plants* **5**:253–257.
- 527 Dai, C., Li, Y., Li, L., Du, Z., Lin, S., Tian, X., Li, S., Yang, B., Yao, W., Wang, J., et al. (2020).  
528 An efficient *Agrobacterium*-mediated transformation method using hypocotyl as explants for  
529 *Brassica napus*. *Mol. Breed.* **40**:96.
- 530 Fu, S., Yin, L., Xu, M., Li, Y., Wang, M., Yang, J., Fu, T., Wang, J., Shen, J., Ali, A., et al. (2018).  
531 Maternal doubled haploid production in interploidy hybridization between *Brassica napus* and  
532 *Brassica allooctaploids*. *Planta* **247**:113–125.
- 533 Gilles, L. M., Khaled, A., Laffaire, J.-B., Chaignon, S., Gendrot, G., Laplaige, J., Bergès, H.,  
534 Beydon, G., Bayle, V., Barret, P., et al. (2017). Loss of pollen-specific phospholipase NOT  
535 LIKE DAD triggers gynogenesis in maize. *EMBO J.* **36**:707–717.
- 536 Hamza, S., Camilleri, C., Pollien, J. M., Vaucheret, H., Bourgin, J. P., and Chupeau, Y. (1993).  
537 Selection for spontaneous tomato haploids using a conditional lethal marker. *Theor. Appl. Genet.*  
538 **86**:657–664.
- 539 He, Y., Zhang, T., Sun, H., Zhan, H., and Zhao, Y. (2020). A reporter for noninvasively monitoring  
540 gene expression and plant transformation. *Hortic. Res.* **7**:152.
- 541 Heusden, S. van, and Lindhout, P. (2018). Genetics and breeding. In *Tomatoes*, pp. 27–58.  
542 Wallingford: CABI.
- 543 Hooghvorst, I., and Nogués, S. (2020a). Opportunities and challenges in doubled haploids and haploid  
544 inducer-mediated genome-editing systems in Cucurbits. *Agronomy* **10**:1441.
- 545 Hooghvorst, I., and Nogués, S. (2020b). Chromosome doubling methods in doubled haploid and  
546 haploid inducer-mediated genome-editing systems in major crops. *Plant Cell Rep.* **1**:3.
- 547 Horsch, R. B., Fry, J. E., Hoffmann, N. L., Eichholtz, D., Rogers, S. G., and Fraley, R. T. (1985).  
548 A simple and general method for transferring genes into plants. *Science (80-. )*. **227**:1229–1231.
- 549 Hougas, R. W., and Peloquin, S. J. (1957). A haploid plant of the potato variety Katahdin. *Nature*  
550 **180**:1209–1210.
- 551 Hougas, R. W., Peloquin, S. J., and Ross, R. W. (1958). Haploids of the common potato. *J. Hered.*  
552 **49**:103–106.
- 553 Hussain, T., and Franks, C. (2019). Discovery of sorghum haploid induction system. In *Methods in*  
554 *Molecular Biology*, pp. 49–59. Humana Press Inc.
- 555 Jacquier, N. M. A., Gilles, L. M., Pyott, D. E., Martinant, J.-P., Rogowsky, P. M., and Widiez, T.  
556 (2020). Puzzling out plant reproduction by haploid induction for innovations in plant breeding.  
557 *Nat. Plants* **6**:610–619.
- 558 Kalinowska, K., Chamas, S., Unkel, K., Demidov, D., Lermontova, I., Dresselhaus, T., Kumlehn,  
559 J., Dunemann, F., and Houben, A. (2019). State-of-the-art and novel developments of in vivo  
560 haploid technologies. *Theor. Appl. Genet.* **132**:593–605.
- 561 Kelliher, T., Starr, D., Richbourg, L., Chintamanani, S., Delzer, B., Nuccio, M. L., Green, J.,

- 562 **Chen, Z., McCuiston, J., Wang, W., et al.** (2017). MATRILINEAL, a sperm-specific  
563 phospholipase, triggers maize haploid induction. *Nature* **542**:105–109.
- 564 **Koornneef, M., van Diepen, J. A. M., Hanhart, C. J., Kieboom-de Waart, A. C., Martinelli, L.,**  
565 **Schoenmakers, H. C. H., and Wijbrandi, J.** (1989). Chromosomal instability in cell- and tissue  
566 cultures of tomato haploids and diploids. *Euphytica* **43**:179–186.
- 567 **Langmead, B., and Salzberg, S. L.** (2012). Fast gapped-read alignment with Bowtie 2. *Nat. Methods*  
568 **9**:357–359.
- 569 **Liu, C., Li, X., Meng, D., Zhong, Y., Chen, C., Dong, X., Xu, X., Chen, B., Li, W., Li, L., et al.**  
570 (2017). A 4-bp insertion at ZmPLA1 encoding a putative phospholipase A generates haploid  
571 induction in maize. *Mol. Plant* **10**:520–522.
- 572 **Liu, C., Zhong, Y., Qi, X., Chen, M., Liu, Z., Chen, C., Tian, X., Li, J., Jiao, Y., Wang, D., et al.**  
573 (2019). Extension of the in vivo haploid induction system from diploid maize to hexaploid wheat.  
574 *Plant Biotechnol. J.* Advance Access published August 13, 2019, doi:10.1111/pbi.13218.
- 575 **Liu, H., Wang, K., Jia, Z., Gong, Q., Lin, Z., Du, L., Pei, X., and Ye, X.** (2020). Efficient induction  
576 of haploid plants in wheat by editing of TaMTL using an optimized Agrobacterium-mediated  
577 CRISPR system. *J. Exp. Bot.* **71**:1337–1349.
- 578 **Lv, J., Yu, K., Wei, J., Gui, H., Liu, C., Liang, D., Wang, Y., Zhou, H., Carlin, R., Rich, R., et al.**  
579 (2020). Generation of paternal haploids in wheat by genome editing of the centromeric histone  
580 CENH3. *Nat. Biotechnol.* **38**:1397–1401.
- 581 **Poplin, R., Ruano-Rubio, V., DePristo, M. A., Fennell, T. J., Carneiro, M. O., Auwera, G. A. Van**  
582 **der, Kling, D. E., Gauthier, L. D., Levy-Moonshine, A., Roazen, D., et al.** (2017). Scaling  
583 accurate genetic variant discovery to tens of thousands of samples. *bioRxiv* Advance Access  
584 published July 24, 2017, doi:10.1101/201178.
- 585 **Prigge, V., Sánchez, C., Dhillon, B. S., Schipprack, W., Araus, J. L., Bänziger, M., and**  
586 **Melchinger, A. E.** (2011). Doubled haploids in tropical maize: I. Effects of inducers and source  
587 germplasm on in vivo haploid induction rates. *Crop Sci.* **51**:1498–1506.
- 588 **Qin, C., Yu, C., Shen, Y., Fang, X., Chen, L., Min, J., Cheng, J., Zhao, S., Xu, M., Luo, Y., et al.**  
589 (2014). Whole-genome sequencing of cultivated and wild peppers provides insights into  
590 Capsicum domestication and specialization. *Proc. Natl. Acad. Sci. U. S. A.* **111**:5135–5140.
- 591 **Ramírez, F., Ryan, D. P., Grüning, B., Bhardwaj, V., Kilpert, F., Richter, A. S., Heyne, S.,**  
592 **Dündar, F., and Manke, T.** (2016). deepTools2: a next generation web server for deep-  
593 sequencing data analysis. *Nucleic Acids Res.* **44**:W160–W165.
- 594 **Ravi, M., and Chan, S. W. L.** (2010). Haploid plants produced by centromere-mediated genome  
595 elimination. *Nature* **464**:615–618.
- 596 **Segu&iacute;simarro, J. M., and Nuez, F.** (2008). Pathways to doubled haploidy: chromosome  
597 doubling during androgenesis. *Cytogenet. Genome Res.* **120**:358–369.
- 598 **Song, J.-M., Guan, Z., Hu, J., Guo, C., Yang, Z., Wang, S., Liu, D., Wang, B., Lu, S., Zhou, R., et**  
599 **al.** (2020). Eight high-quality genomes reveal pan-genome architecture and ecotype  
600 differentiation of Brassica napus. *Nat. Plants* **6**:34–45.
- 601 **Takahashi, T., Mori, T., Ueda, K., Yamada, L., Nagahara, S., Higashiyama, T., Sawada, H., and**  
602 **Igawa, T.** (2018). The male gamete membrane protein DMP9/DAU2 is required for double  
603 fertilization in flowering plants. *Development* **145**:dev170076.
- 604 **Tan, E. H., Henry, I. M., Ravi, M., Bradnam, K. R., Mandakova, T., Marimuthu, M. P. A., Korf,**  
605 **I., Lysak, M. A., Comai, L., and Chan, S. W. L.** (2015). Catastrophic chromosomal  
606 restructuring during genome elimination in plants. *Elife* **4**.
- 607 **van Roekel, J. S. C., Damm, B., Melchers, L. S., and Hoekema, A.** (1993). Factors influencing  
608 transformation frequency of tomato (*Lycopersicon esculentum*). *Plant Cell Rep.* **12**:644–647.
- 609 **Wang, R., Tavano, E. C. da R., Lammers, M., Martinelli, A. P., Angenent, G. C., and de Maagd,**  
610 **R. A.** (2019). Re-evaluation of transcription factor function in tomato fruit development and  
611 ripening with CRISPR/Cas9-mutagenesis. *Sci. Rep.* **9**:1696.
- 612 **Wang, N., Gent, J. I., and Dawe, R. K.** (2021). Haploid induction by a maize cenH3 null mutant. *Sci.*  
613 *Adv.* **7**:eabe2299.
- 614 **Wu, P., Li, H., Ren, J., and Chen, S.** (2014). Mapping of maternal QTLs for in vivo haploid induction  
615 rate in maize (*Zea mays* L.). *Euphytica* **196**:413–421.
- 616 **Yao, L., Zhang, Y., Liu, C., Liu, Y., Wang, Y., Liang, D., Liu, J., Sahoo, G., and Kelliher, T.**  
617 (2018). OsMATL mutation induces haploid seed formation in indica rice. *Nat. Plants* **4**:530–533.
- 618 **Ye, M., Peng, Z., Tang, D., Yang, Z., Li, D., Xu, Y., Zhang, C., and Huang, S.** (2018). Generation  
619 of self-compatible diploid potato by knockout of S-RNase. *Nat. plants* **4**:651–654.

620 **Zhong, Y., Liu, C., Qi, X., Jiao, Y., Wang, D., Wang, Y., Liu, Z., Chen, C., Chen, B., Tian, X., et**  
621 **al.** (2019). Mutation of ZmDMP enhances haploid induction in maize. *Nat. Plants* **5**:575–580.  
622 **Zhong, Y., Chen, B., Li, M., Wang, D., Jiao, Y., Qi, X., Wang, M., Liu, Z., Chen, C., Wang, Y., et**  
623 **al.** (2020). A DMP-triggered in vivo maternal haploid induction system in the dicotyledonous  
624 *Arabidopsis*. *Nat. Plants* **6**:466–472.  
625

626 **FIGURES LEGENDS**

627 **Figure 1. *DMP* genes from multiple dicot crops complement *dmp8dmp9***  
628 **phenotypes in arabidopsis.** (A) Representative images of siliques from the *dmp8dmp9*  
629 mutant and different complementation lines in the *dmp8dmp9* background. Scale bar, 2  
630 mm. (B) Quantification of seed number per silique in the *dmp8dmp9* mutant and the  
631 corresponding complementation lines. The bars with different colors indicate different  
632 plant families. Data represent the mean  $\pm$  s.d.; \*\*\* $p < 0.001$  (two-tailed Student's *t*-  
633 test); *n*, number of siliques. The detailed information of each gene are described in  
634 Supplemental Table 1.

635 **Figure 2. Mutation of tomato *SIDMP* induces haploids.** (A) The CRISPR/Cas9  
636 mutagenesis vector comprising two sgRNAs (*gRNA1-2*) targeting *SIDMP*, and the  
637 *pNos:NPTII* and *p35S:GFP* and FAST-Red selection cassettes. (B) Schematic  
638 representation of the wild-type (WT) *SIDMP* gene. Filled blocks, clear blocks and the  
639 gray line indicate the coding region, the untranslated regions, and the intron,  
640 respectively. Green blocks correspond to the four predicted transmembrane domains  
641 (TM). Pink lines indicate the two regions (T1, T2) targeted by the sgRNAs. The  
642 sequences from wild type (WT) and mutant alleles from three backgrounds (AC, Ailsa  
643 Craig; MT, Micro-Tom; MB, Moneyberg) are shown below the overview. The sgRNA  
644 target sequences are underlined, and the protospacer-adjacent motif (PAM) is shown in  
645 red. Nucleotide insertions are shown in blue and deletions by red dashes. (C)  
646 Representative images of ripe fruit from selfed WT and CRISPR-Cas9 *sldmp* mutants  
647 in the Ailsa Craig background. White, black, and blue arrowheads indicate normal seeds,  
648 aborted seeds and undeveloped ovules, respectively. (D and E) Quantification of seed  
649 number (D) and seed phenotypes (E) in fruits shown in (C). Data represent the mean  $\pm$   
650 s.d.; \*\*\* $p < 0.001$  (two-tailed Student's *t*-test); *n*, number of fruits. (F to J) Phenotypes  
651 of plants (F), leaves (G), inflorescences (H), flower buds (I) and dissected flower parts  
652 (J) of haploid (H) and diploid (D) plants. (K) Flow cytometry verification of the ploidy  
653 of a putative haploid and a diploid control. The *x* axis represents the signal peak for the  
654 nucleus and the *y* axis represents the number of nuclei. Scale bars: 1 cm (C, H, I and J),  
655 10cm (F) and 5 cm (G). In (C) and (K), experiments were repeated at least three times  
656 and similar results were obtained.

657 **Figure 3. Haploid production through *sldmp* outcrossing and FAST-Red-based**  
658 **haploid seed identification.** (A) Representative images of DF199 ripened fruit  
659 pollinated by wild type and an *sldmp* mutant in the Ailsa Craig background. White,  
660 black, and blue arrowhead indicate normal seeds, aborted seeds, and undeveloped  
661 ovules, respectively. (B and C) Quantification of seed number (B) and seed phenotypes  
662 (C) in fruits derived after DF199 pollination by wild type and *sldmp* mutant pollen.  
663 Data represent the mean  $\pm$  s.d.; \*\*\* $p < 0.001$  (two-tailed Student's *t*-test); *n*, number of  
664 fruits. WT, wild type. (D) Schematic overview of haploid identification using the  
665 FAST-Red marker in the *sldmp* inducer line. After NaOCl treatment, white and red  
666 seeds can be easily distinguished under white light. Under fluorescent light, a few white



667 seeds with strong RFP expression were regrouped. During germination, both groups  
668 were further checked for the absence/presence of RFP in the root tip. Seeds with weak  
669 RFP expression do not show RFP signal in embryo root tip and are putative haploids.  
670 These putative haploids can be further confirmed by molecular markers and ploidy  
671 analysis. (E and F) FAST-Red-based haploid seed identification. White light (left  
672 panel), fluorescent light (middle panel) and merged (right panel) micrographs of control,  
673 haploid and diploid seeds in the imbibed (E) and germinated (F) state. Control seeds  
674 were derived from a DF199 × Ailsa Craig cross. Haploid and diploid seeds were derived  
675 from DF199 × *sldmp* (Ailsa Craig) cross. (G) Representative images of tomato haploid  
676 and diploid seedlings. (H) Seedlings from putative haploids were genotyped with  
677 polymorphic markers between the inducer line and testers. The left lane shows the DNA  
678 size marker, and the Roman numbers I to VII represent the PCR products in DF199 (I),  
679 AF01 (II), *sldmp* mutant in Ailsa Craig background (III), haploid from DF199 × *sldmp*  
680 (IV), haploid from AF01 × *sldmp* (V), diploid from DF199 × *sldmp* (VI) and diploid  
681 from AF01 × *sldmp* (VII). Scale bars: 1 cm (A), 2 mm (E and F) and 5 cm (G). In A, E,  
682 F, G and H, experiments were repeated at least three times and similar results were  
683 obtained.

684 **Figure 4. Mutation of BnDMP genes induces haploid seed formation.** (A) The  
685 CRISPR/Cas9 mutagenesis vector comprising four sgRNAs (*gRNA1-4*) targeting three  
686 *BnDMP* genes, and the *pNos:NPTII* and the *p35S:GFP* and FAST-Red  
687 (*pOLEO1:OLEO1-RFP*) selection cassettes. (B) Schematic representation of the wild-  
688 type *BnDMP* genes. Filled blocks, clear blocks and the gray line indicate the coding  
689 region, the untranslated regions, and the intron, respectively. Green blocks correspond  
690 to the four predicted transmembrane domains (TM). Pink lines indicate the regions (T1,  
691 T2, T3 and T4) targeted by the sgRNAs. The sequences from wild type (WT) and  
692 mutant alleles are shown below the overview. The sgRNA target sequences are  
693 underlined, and the protospacer-adjacent motif (PAM) is shown in red. Nucleotide  
694 insertions are shown in blue and deletions by red dashes. (C and D) Quantification of  
695 seed number per pod (C) and seed set phenotypes (D) from WT and independent  
696 CRISPR–Cas9 lines. Data represent the mean ± s.d.; \*\*\* $p < 0.001$  (two-tailed Student's  
697 *t*-test); ns, not statistically significant. *n*, number of siliques. (E and F) RFP expression  
698 of WT and T0-7 transgenic seeds in the imbibed (E) and germinated (F) state under  
699 white light (left panel) and fluorescent light (right panel). (G) Seedlings lacking RFP  
700 expression in germinated embryos were genotyped with polymorphic markers between  
701 the inducer line and testers. The left lane shows the DNA size marker, and the Roman  
702 numbers I to VI represent the PCR products from the inducer (I), Hau-A (II), haploid  
703 (III to V), and amphidiploid (VI) lines. (H) Representative images of rapeseed haploid  
704 and amphidiploid seedlings. (I) Flow cytometry verification of the ploidy of a putative  
705 haploid and an amphidiploid control. The *x* axis represents the signal peak for the  
706 nucleus and the *y* axis represents the number of nuclei. Scale bars: 5 mm (E and F) and  
707 5 cm (H). In E to I, experiments were repeated at least three times and similar results  
708 were obtained.

709 **Figure 5. Tobacco *ntdmp* mutation induces maternal haploids.** (A) Schematic of the  
710 *NtDMP* CRISPR/Cas9 mutagenesis vector. (B) Schematic representation of the wild-  
711 type (WT) *NtDMP* genes. Filled blocks, clear blocks and the gray line indicate the  
712 coding region, the untranslated regions, and the intron, respectively. Green blocks  
713 correspond to the four predicted transmembrane domains (TM). Pink lines indicate the  
714 regions (T1, T2, T3 and T4) targeted by the sgRNAs. The sequences from WT and  
715 mutant alleles from the three tobacco *DMP* genes are shown below the overview. The  
716 sgRNA target sequences are underlined, and the protospacer-adjacent motif (PAM) is  
717 shown in red. Nucleotide insertions are shown in blue and deletions by red dashes. (C)  
718 Seedlings from cross progeny were genotyped with polymorphic markers between the  
719 inducer line and testers to identify putative haploids. The left lane shows the DNA size  
720 marker, and the Roman numbers I to IV represent the PCR products from the K326 (I),  
721 inducer (II), haploid (III) and amphidiploid (IV) lines. (D) Flow cytometry verification  
722 of the ploidy of a putative haploid and an amphidiploid control. The *x* axis represents  
723 the signal peak for the nucleus and the *y* axis represents the number of nuclei. (E and  
724 F) Representative images of tobacco haploid and tetraploid seedling (E) and plants (F).  
725 Scale bars: 10 cm (E) and 20 cm (F). In E to F, experiments were repeated at least three  
726 times and similar results were obtained.

727

728 **FIGURES**

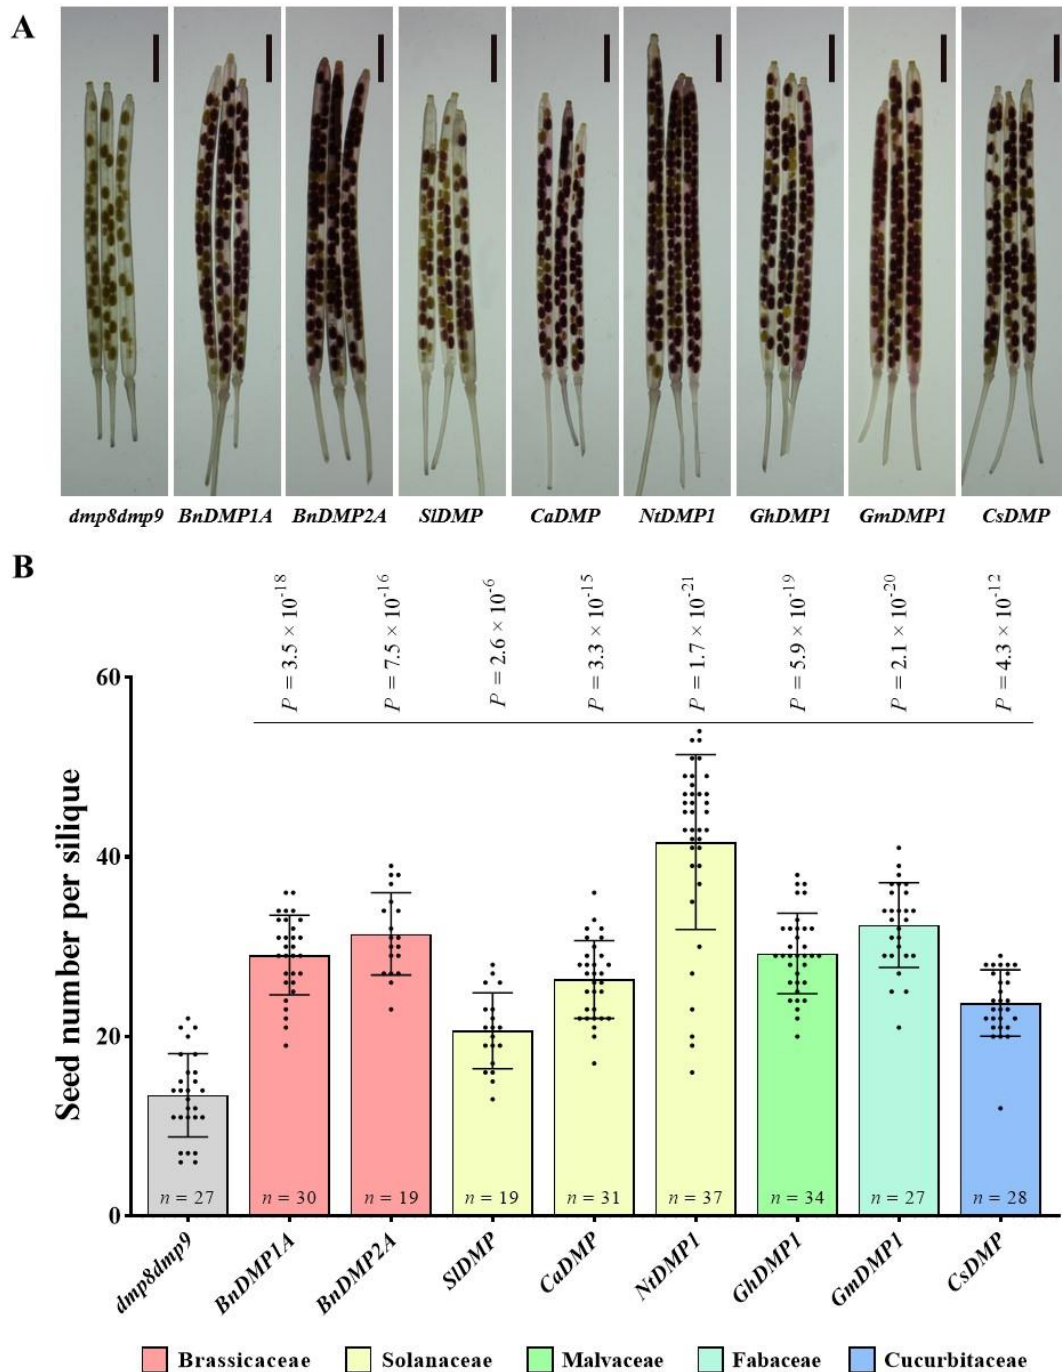

729

730 **Figure 1. *DMP* genes from multiple dicot crops complement *dmp8dmp9***  
731 **phenotypes in arabidopsis.** (A) Representative images of siliques from the *dmp8dmp9*  
732 mutant and different complementation lines in the *dmp8dmp9* background. Scale bar, 2  
733 mm. (B) Quantification of seed number per silique in the *dmp8dmp9* mutant and the  
734 corresponding complementation lines. The bars with different colors indicate different  
735 plant families. Data represent the mean  $\pm$  s.d.; \*\*\* $p < 0.001$  (two-tailed Student's *t*-  
736 test); *n*, number of siliques. The detailed information of each gene are described in  
737 Supplemental Table 1.

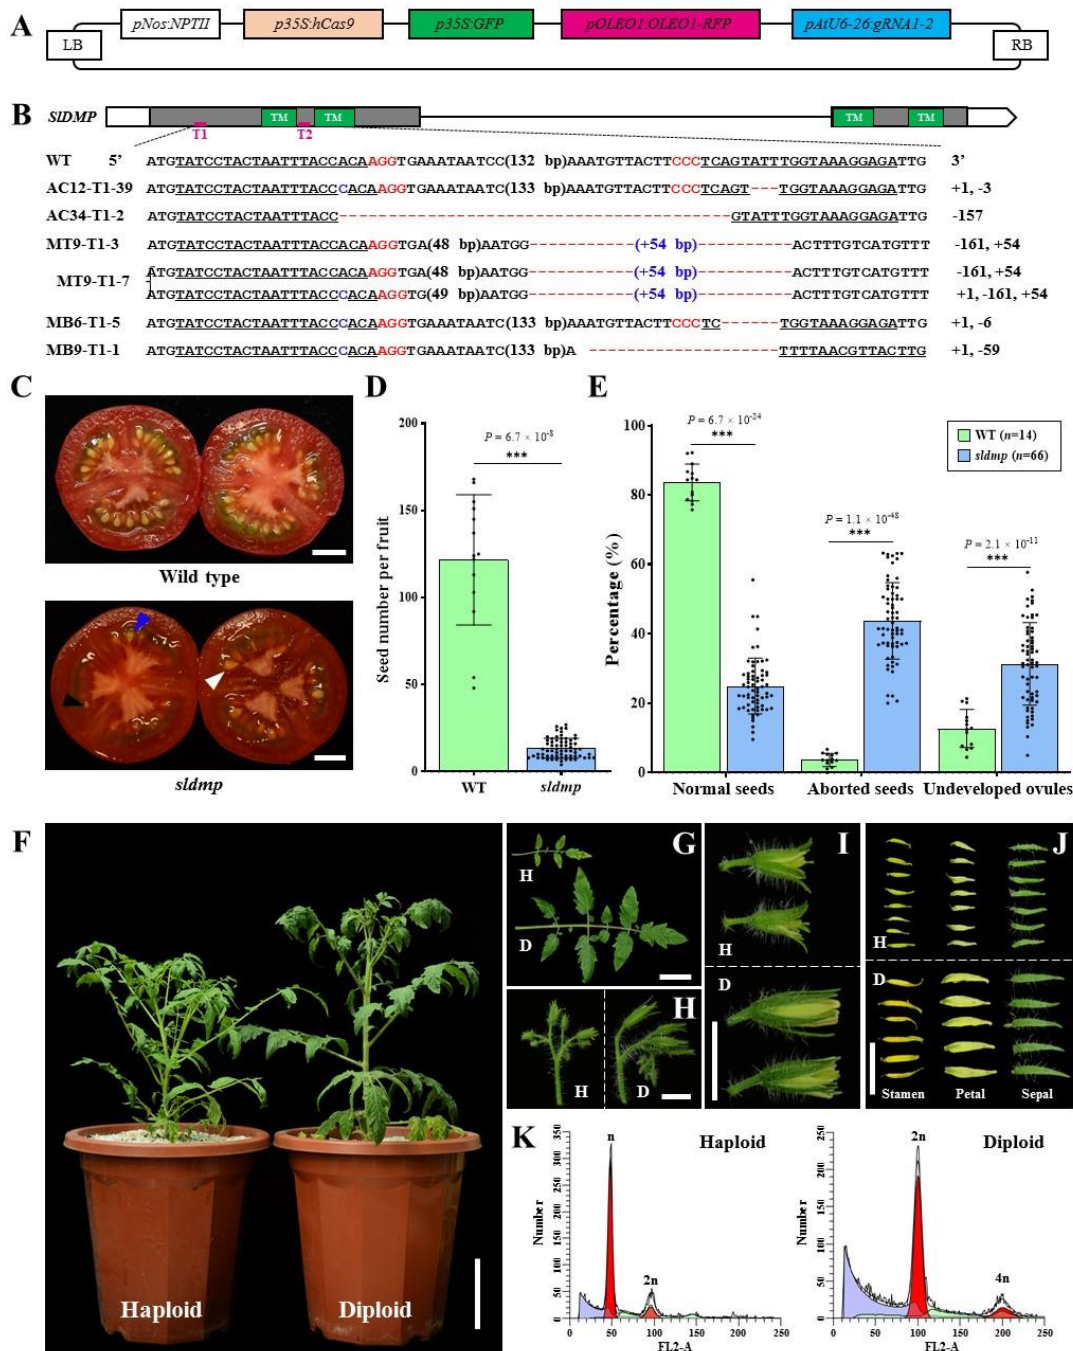

738

739

740

741

742

743

744

745

746

747

748

749

**Figure 2. Mutation of tomato *SIDMP* induces haploids.** (A) The CRISPR/Cas9 mutagenesis vector comprising two sgRNAs (*gRNA1-2*) targeting *SIDMP*, and the *pNos:NPTII* and *p35S:GFP* and FAST-Red selection cassettes. (B) Schematic representation of the wild-type (WT) *SIDMP* gene. Filled blocks, clear blocks and the gray line indicate the coding region, the untranslated regions, and the intron, respectively. Green blocks correspond to the four predicted transmembrane domains (TM). Pink lines indicate the two regions (T1, T2) targeted by the sgRNAs. The sequences from wild type (WT) and mutant alleles from three backgrounds (AC, Ailsa Craig; MT, Micro-Tom; MB, Moneyberg) are shown below the overview. The sgRNA target sequences are underlined, and the protospacer-adjacent motif (PAM) is shown in red. Nucleotide insertions are shown in blue and deletions by red dashes. (C)

750 Representative images of ripe fruit from selfed WT and CRISPR-Cas9 *sldmp* mutants  
751 in the Ailsa Craig background. White, black, and blue arrowheads indicate normal seeds,  
752 aborted seeds and undeveloped ovules, respectively. **(D and E)** Quantification of seed  
753 number (D) and seed phenotypes (E) in fruits shown in (C). Data represent the mean  $\pm$   
754 s.d.; \*\*\* $p < 0.001$  (two-tailed Student's *t*-test); *n*, number of fruits. **(F to J)** Phenotypes  
755 of plants (F), leaves (G), inflorescences (H), flower buds (I) and dissected flower parts  
756 (J) of haploid (H) and diploid (D) plants. **(K)** Flow cytometry verification of the ploidy  
757 of a putative haploid and a diploid control. The *x* axis represents the signal peak for the  
758 nucleus and the *y* axis represents the number of nuclei. Scale bars: 1 cm (C, H, I and J),  
759 10cm (F) and 5 cm (G). In (C) and (K), experiments were repeated at least three times  
760 and similar results were obtained.



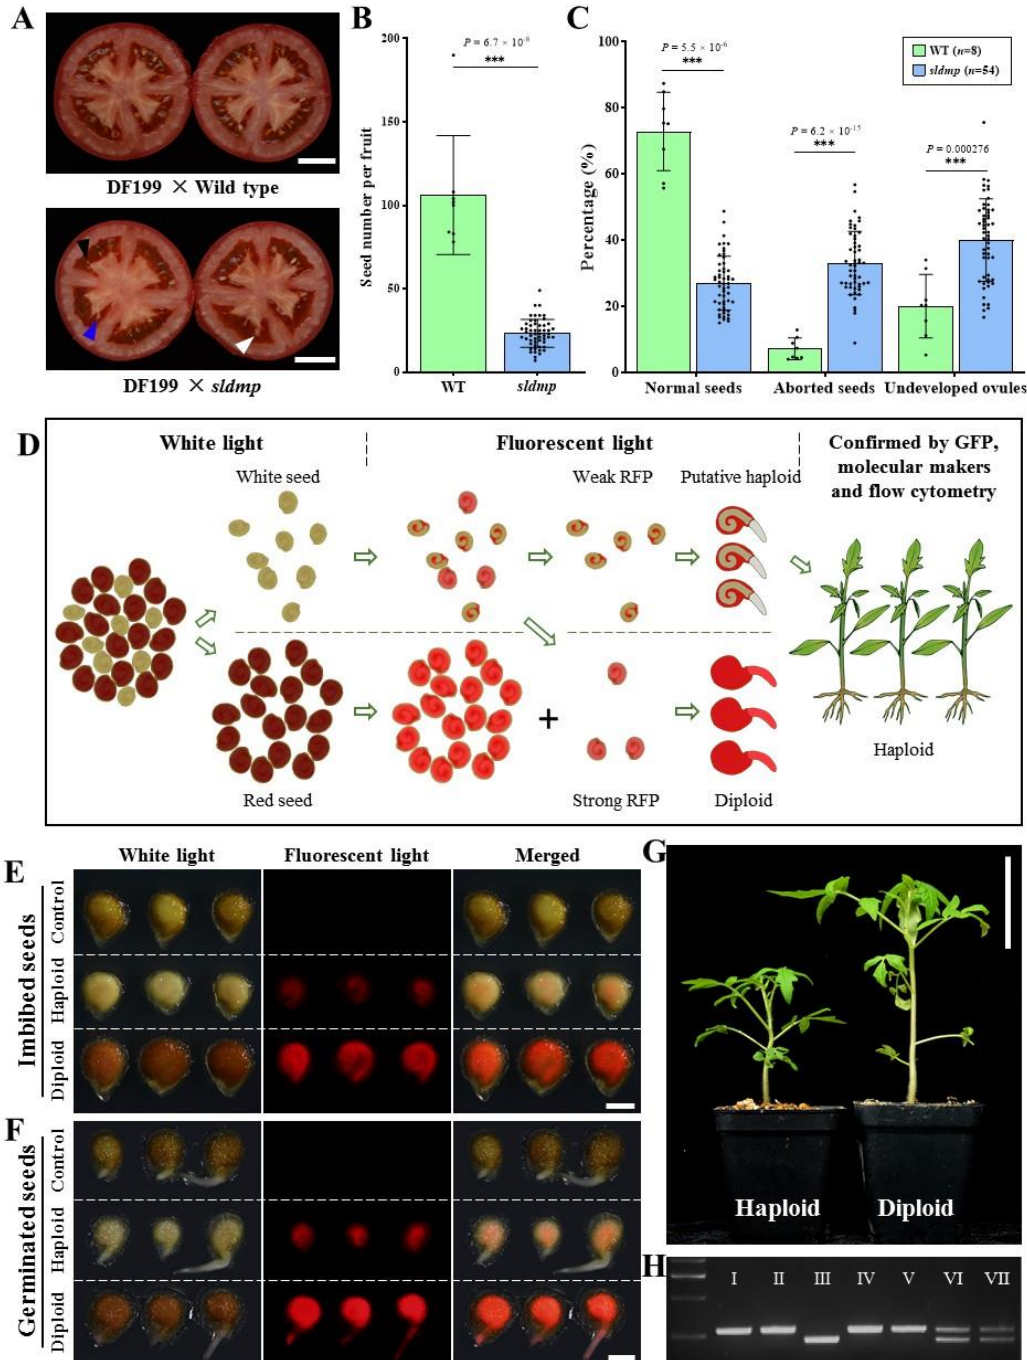

761

762

763

764

765

766

767

768

769

770

771

772

**Figure 3. Haploid production through *sldmp* outcrossing and FAST-Red-based haploid seed identification.** (A) Representative images of DF199 ripened fruit pollinated by wild type and an *sldmp* mutant in the Ailsa Craig background. White, black, and blue arrowhead indicate normal seeds, aborted seeds, and undeveloped ovules, respectively. (B and C) Quantification of seed number (B) and seed phenotypes (C) in fruits derived after DF199 pollination by wild type and *sldmp* mutant pollen. Data represent the mean  $\pm$  s.d.; \*\*\* $p < 0.001$  (two-tailed Student's *t*-test); *n*, number of fruits. WT, wild type. (D) Schematic overview of haploid identification using the FAST-Red marker in the *sldmp* inducer line. After NaOCl treatment, white and red seeds can be easily distinguished under white light. Under fluorescent light, a few white seeds with strong RFP expression were regrouped. During germination, both groups

773 were further checked for the absence/presence of RFP in the root tip. Seeds with weak  
774 RFP expression do not show RFP signal in embryo root tip and are putative haploids.  
775 These putative haploids can be further confirmed by molecular markers and ploidy  
776 analysis. **(E and F)** FAST-Red-based haploid seed identification. White light (left  
777 panel), fluorescent light (middle panel) and merged (right panel) micrographs of control,  
778 haploid and diploid seeds in the imbibed (E) and germinated (F) state. Control seeds  
779 were derived from a DF199 × Ailsa Craig cross. Haploid and diploid seeds were derived  
780 from DF199 × *sldmp* (Ailsa Craig) cross. **(G)** Representative images of tomato haploid  
781 and diploid seedlings. **(H)** Seedlings from putative haploids were genotyped with  
782 polymorphic markers between the inducer line and testers. The left lane shows the DNA  
783 size marker, and the Roman numbers I to VII represent the PCR products in DF199 (I),  
784 AF01 (II), *sldmp* mutant in Ailsa Craig background (III), haploid from DF199 × *sldmp*  
785 (IV), haploid from AF01 × *sldmp* (V), diploid from DF199 × *sldmp* (VI) and diploid  
786 from AF01 × *sldmp* (VII). Scale bars: 1 cm (A), 2 mm (E and F) and 5 cm (G). In A, E,  
787 F, G and H, experiments were repeated at least three times and similar results were  
788 obtained.  
789

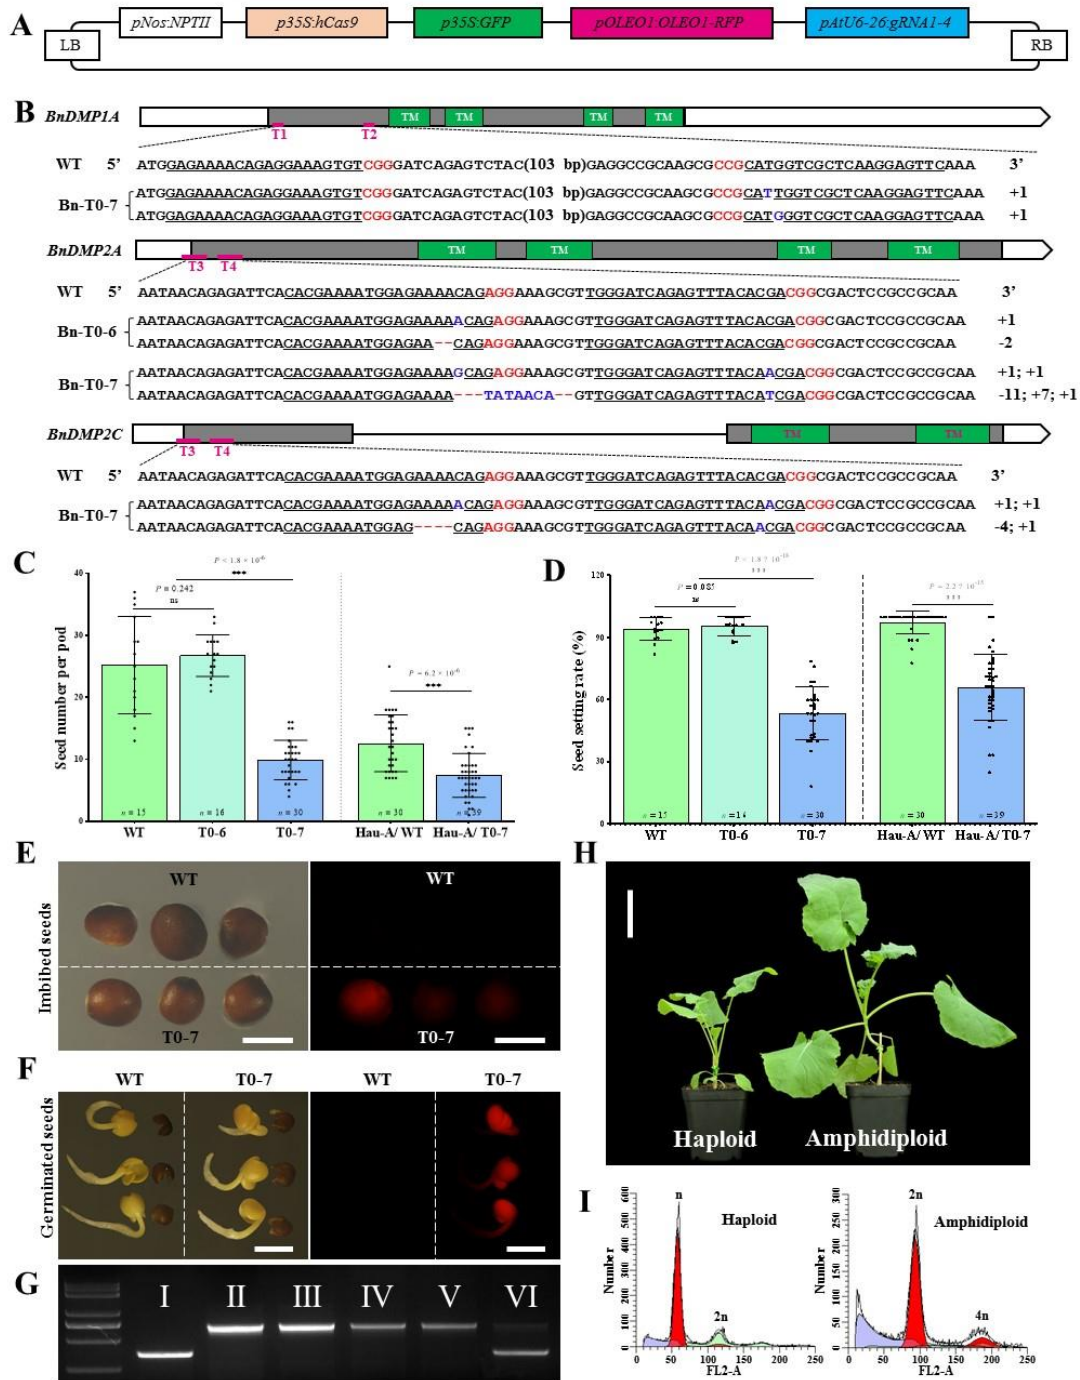

790  
791 **Figure 4. Mutation of *BnDMP* genes induces haploid seed formation.** (A) The  
792 CRISPR/Cas9 mutagenesis vector comprising four sgRNAs (*gRNA1-4*) targeting three  
793 *BnDMP* genes, and the *pNos:NPTII* and the *p35S:GFP* and FAST-Red  
794 (*pOLEO1:OLEO1-RFP*) selection cassettes. (B) Schematic representation of the wild-  
795 type *BnDMP* genes. Filled blocks, clear blocks and the gray line indicate the coding  
796 region, the untranslated regions, and the intron, respectively. Green blocks correspond  
797 to the four predicted transmembrane domains (TM). Pink lines indicate the regions (T1,  
798 T2, T3 and T4) targeted by the sgRNAs. The sequences from wild type (WT) and  
799 mutant alleles are shown below the overview. The sgRNA target sequences are  
800 underlined, and the protospacer-adjacent motif (PAM) is shown in red. Nucleotide

801 insertions are shown in blue and deletions by red dashes. **(C and D)** Quantification of  
802 seed number per pod (C) and seed set phenotypes (D) from WT and independent  
803 CRISPR–Cas9 lines. Data represent the mean  $\pm$  s.d.; \*\*\* $p < 0.001$  (two-tailed Student’s  
804  $t$ -test); ns, not statistically significant.  $n$ , number of siliques. **(E and F)** RFP expression  
805 of WT and T0-7 transgenic seeds in the imbibed (E) and germinated (F) state under  
806 white light (left panel) and fluorescent light (right panel). **(G)** Seedlings lacking RFP  
807 expression in germinated embryos were genotyped with polymorphic markers between  
808 the inducer line and testers. The left lane shows the DNA size marker, and the Roman  
809 numbers I to VI represent the PCR products from the inducer (I), Hau-A (II), haploid  
810 (III to V), and amphidiploid (VI) lines. **(H)** Representative images of rapeseed haploid  
811 and amphidiploid seedlings. **(I)** Flow cytometry verification of the ploidy of a putative  
812 haploid and an amphidiploid control. The  $x$  axis represents the signal peak for the  
813 nucleus and the  $y$  axis represents the number of nuclei. Scale bars: 5 mm (E and F) and  
814 5 cm (H). In E to I, experiments were repeated at least three times and similar results  
815 were obtained.  
816



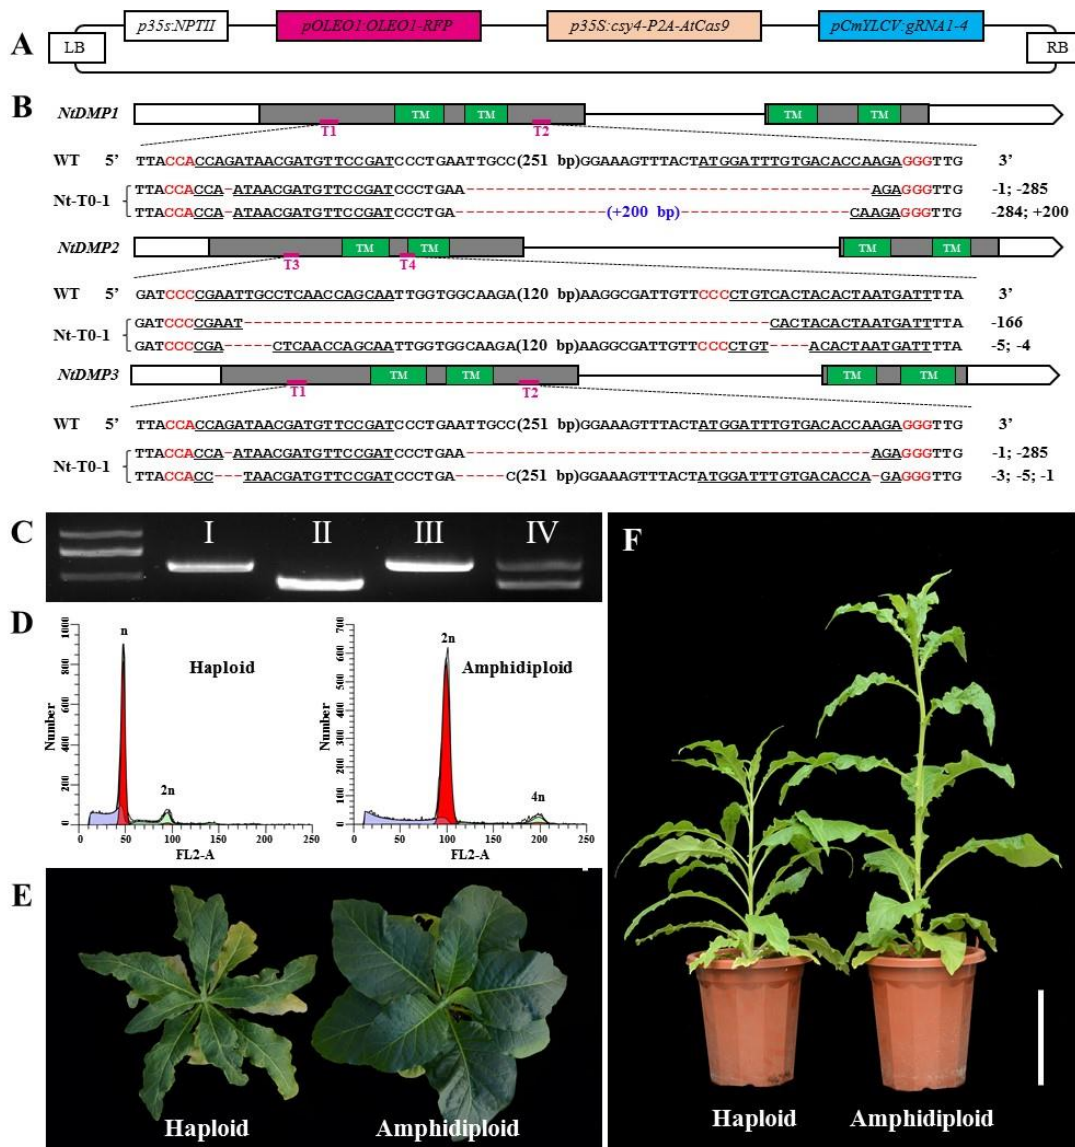

817

818 **Figure 5. Tobacco *ntdmp* mutation induces maternal haploids.** (A) Schematic of the

819 *NiDMP* CRISPR/Cas9 mutagenesis vector. (B) Schematic representation of the wild-

820 type (WT) *NiDMP* genes. Filled blocks, clear blocks and the gray line indicate the

821 coding region, the untranslated regions, and the intron, respectively. Green blocks

822 correspond to the four predicted transmembrane domains (TM). Pink lines indicate the

823 regions (T1, T2, T3 and T4) targeted by the sgRNAs. The sequences from WT and

824 mutant alleles from the three tobacco *DMP* genes are shown below the overview. The

825 sgRNA target sequences are underlined, and the protospacer-adjacent motif (PAM)

826 is shown in red. Nucleotide insertions are shown in blue and deletions by red dashes. (C)

827 Seedlings from cross progeny were genotyped with polymorphic markers between the

828 inducer line and testers to identify putative haploids. The left lane shows the DNA size

829 marker, and the Roman numbers I to IV represent the PCR products from the K326 (I),

830 inducer (II), haploid (III) and amphidiploid (IV) lines. (D) Flow cytometry verification

831 of the ploidy of a putative haploid and an amphidiploid control. The *x* axis represents

832 the signal peak for the nucleus and the *y* axis represents the number of nuclei. (E and

833 F) Representative images of tobacco haploid and tetraploid seedling (E) and plants (F).



834 Scale bars: 10 cm (E) and 20 cm (F). In E to F, experiments were repeated at least three  
835 times and similar results were obtained.  
836

837 **Table 1. Haploid induction rate in *slomp* mutant crosses.**

| Female parent | Male parent    | Seed setting rate (%) | Total seeds   | Haploids   | HIR (%)            |
|---------------|----------------|-----------------------|---------------|------------|--------------------|
| DF199         | AC34-T2-2      | 26.08                 | 1,536         | 19         | 1.24               |
|               | AC34-T2-4      | 24.62                 | 927           | 14         | 1.51               |
|               | AC34-T2-15     | 26.31                 | 751           | 14         | 1.86               |
|               | AC34-T2-16     | 26.12                 | 1,084         | 13         | 1.20               |
| MT.AC         | AC34-T2-4      | 15.56                 | 1,688         | 24         | 1.42               |
|               | AC34-T2-9      | 24.69                 | 1,483         | 21         | 1.42               |
|               | AC34-T2-10     | 21.81                 | 677           | 9          | 1.33               |
|               | AC34-T2-15     | 19.33                 | 2,430         | 39         | 1.60               |
|               | AC34-T2-16     | 16.53                 | 1,880         | 32         | 1.70               |
| DF1.MT        | AC34-T2-4      | 18.73                 | 1,358         | 34         | 2.50               |
|               | AC34-T2-13     | 18.65                 | 1,982         | 38         | 1.92               |
|               | AC34-T2-15     | 22.44                 | 749           | 24         | 3.20               |
| JZ801         | AC34-T2-13     | 15.67                 | 967           | 19         | 1.96               |
|               | AC34-T2-41     | 15.22                 | 379           | 5          | 1.32               |
| 1004          | AC34-T2-2      | 21.27                 | 148           | 4          | 2.70               |
|               | AC34-T2-15     | 28.51                 | 246           | 4          | 1.63               |
| 1006          | AC34-T2-15     | 26.00                 | 335           | 9          | 2.69               |
|               | AC34-T2-16     | 23.13                 | 344           | 8          | 2.33               |
| 4013          | AC34-T2-Mix    | 28.74                 | 693           | 6          | 0.87               |
| 4014          | AC34-T2-Mix    | 12.57                 | 357           | 2          | 0.56               |
| 4015          | AC34-T2-Mix    | 9.97                  | 809           | 4          | 0.49               |
| 4024          | AC34-T2-Mix    | 24.50                 | 191           | 2          | 1.05               |
| 4025          | AC34-T2-Mix    | 34.12                 | 962           | 5          | 0.52               |
| 4029          | AC34-T2-Mix    | 22.12                 | 252           | 2          | 0.79               |
| 4034          | AC34-T2-Mix    | 18.48                 | 437           | 7          | 1.60               |
| 4035          | AC34-T2-Mix    | ND                    | 307           | 8          | 2.61               |
| 4036          | AC34-T2-Mix    | ND                    | 226           | 7          | 3.10               |
| 4037          | AC34-T2-Mix    | ND                    | 148           | 2          | 1.35               |
| 4038          | AC34-T2-Mix    | ND                    | 137           | 4          | 2.92               |
| 4039          | AC34-T2-Mix    | ND                    | 151           | 4          | 2.65               |
| 4040          | AC34-T2-Mix    | ND                    | 190           | 7          | 3.68               |
| 4041          | AC34-T2-Mix    | ND                    | 201           | 3          | 1.49               |
| 4042          | AC34-T2-Mix    | ND                    | 332           | 8          | 2.41               |
| 4043          | AC34-T2-Mix    | ND                    | 485           | 9          | 1.86               |
| 4044          | AC34-T2-Mix    | ND                    | 360           | 9          | 2.50               |
| 4048          | AC34-T2-Mix    | ND                    | 75            | 1          | 1.33               |
| 4049          | AC34-T2-Mix    | ND                    | 440           | 7          | 1.59               |
| 4050          | AC34-T2-Mix    | ND                    | 331           | 5          | 1.51               |
| 4053          | AC34-T2-Mix    | ND                    | 454           | 7          | 1.54               |
| 4055          | AC34-T2-Mix    | ND                    | 182           | 5          | 2.75               |
| 4056          | AC34-T2-Mix    | ND                    | 268           | 7          | 2.61               |
| 4057          | AC34-T2-Mix    | ND                    | 369           | 9          | 2.44               |
| 4059          | AC34-T2-Mix    | ND                    | 238           | 7          | 2.94               |
| 4060          | AC34-T2-Mix    | ND                    | 233           | 6          | 2.58               |
| 4063          | AC34-T2-Mix    | ND                    | 522           | 14         | 2.68               |
| 4064          | AC34-T2-Mix    | ND                    | 576           | 11         | 1.91               |
| 4066          | AC34-T2-Mix    | ND                    | 354           | 9          | 2.54               |
| 4068          | AC34-T2-Mix    | ND                    | 153           | 2          | 1.31               |
| <b>Total</b>  | <b>AC34-T2</b> | <b>24.70</b>          | <b>29,397</b> | <b>509</b> | <b>1.94 ± 0.74</b> |

838 Information on the genotype of the female parents is provided in Supplemental Table  
839 4. The genotype of each male parent is listed in Supplemental Table 3. Haploids were  
840 first screened for a lack of embryo RFP expression and then further verified by  
841 molecular marker and ploidy analysis. The haploid induction rate (HIR) was calculated  
842 with the formula:  $\text{HIR (\%)} = (\text{number of haploids}) / (\text{total seed number}) \times 100\%$ . AC34-  
843 T2-Mix, pollen was a mix of different AC34-T2 lines. ND, not determined.

844 **Table 2. Haploid induction rate in *bndmp* mutant progeny.**

| Female parent  | Male parent | Genotype (1A, 2A, 2C) | Seed setting rate (%) | Total plants | Haploids | HIR (%) |
|----------------|-------------|-----------------------|-----------------------|--------------|----------|---------|
| Bn-T0-7        | Bn-T0-7     | -/-, -/-, -/Δ         | 53.52                 | 97           | 1        | 1.03    |
|                | Westar      | WT                    | 97.45                 | 557          | 0        | 0       |
| Hau-A          | Bn-T0-7     | -/-, -/-, -/Δ         | 65.98                 | 570          | 22       | 3.86    |
|                | Bn-T0-18    | +/+, -/-, -/-         | 98.48                 | 91           | 1        | 1.10    |
|                | Bn-T1-3     | -/-, -/-, -/Δ         | 67.34                 | 447          | 7        | 1.57    |
| <i>pol</i> CMS | Bn-T0-18    | +/+, -/-, -/-         | 87.41                 | 194          | 0        | 0       |
|                | Bn-T1-1     | -/-, -/-, -/-         | 42.57                 | 83           | 2        | 2.41    |
|                | Bn-T1-2     | -/-, -/-, -/-         | 48.41                 | 182          | 3        | 1.65    |

845 “1A”, “2A” and “2C” represent the *BnDMP1A*, *BnDMP2A* and *BnDMP2C* genes,  
 846 respectively. “+”, wild-type allele. “-”, frame shift with gain of stop codon allele. “Δ”,  
 847 in-frame deletion allele. The sequence of the mutant alleles for each male parent is listed  
 848 in Supplemental Table 3. Haploids were first screened for a lack of RFP expression in  
 849 germinated embryos and then further verified by molecular markers and ploidy analysis.  
 850 The haploid induction rate (HIR) was calculated with the formula: HIR (%) = (number  
 851 of haploids) / (total plants) × 100%.

852 **Table 3. Haploid induction rate in *ntdmp* mutant progeny.**

| Pollinations    | Genotype (1, 2, 3) | Total plants | Haploids | HIR (%) |
|-----------------|--------------------|--------------|----------|---------|
| K326⊗           | Wild type          | 171          | 0        | 0       |
| Nt-T0-1⊗        | -/-, -/-, -/-      | 1,111        | 9        | 0.81    |
| Nt-T0-4⊗        | +/-, -/-, -/Δ      | 322          | 0        | 0       |
| Nt-T0-9⊗        | +/-, -/-, -/-      | 192          | 0        | 0       |
| K326 × Nt-T1-1  | -/-, -/-, -/-      | 356          | 3        | 0.84    |
| K326 × Nt-T1-2  | -/-, -/-, -/-      | 675          | 11       | 1.63    |
| Yan97 × Nt-T1-1 | -/-, -/-, -/-      | 551          | 5        | 0.91    |
| Yan97 × Nt-T1-2 | -/-, -/-, -/-      | 851          | 10       | 1.18    |

853 “1”, “2” and “3” in the “Genotype (1, 2, 3)” represent the *NtDMP1*, *NtDMP2* and  
 854 *NtDMP3* genes, respectively. “+”, wild-type allele. “-”, frame shift with gain of stop  
 855 codon allele. “Δ”, in-frame deletion allele. The sequence of the mutant alleles for each  
 856 male parent is listed in Supplemental Table 3. Haploids were first screened by  
 857 molecular markers and then verified by ploidy analysis. The haploid induction rate  
 858 (HIR) was calculated with the formula: HIR (%) = (number of haploids) / (total plants)  
 859 × 100%.
